# Supplementary material for: CO homologation and isocyanide activation by a trisilyl alane radical anion
Source: Royal Society of Chemistry journal article supplement (doi:10.1039/d6cc02324j), 2026-06-08
Supplement: d6cc02324j1.pdf [file d6cc02324j1.pdf]

## Supporting Information

# CO Homologation and Isocyanide Activation by a Trisilyl Alane Radical Anion

Yueer Zhu<sup>1</sup>, Xufang Liu<sup>1</sup>, Fiona J. Kiefer<sup>1</sup> and Shigeyoshi Inoue\*<sup>1</sup>

<sup>1</sup> Department of Chemistry, TUM School of Natural Science, Technische Universität München, Lichtenbergstraße 4, 85375, Garching bei München, Germany

\* E-mail: s.inoue@tum.de.

|          |                                                                                                    |           |
|----------|----------------------------------------------------------------------------------------------------|-----------|
| <b>1</b> | <b>General Methods and Instrumentation</b> .....                                                   | <b>3</b>  |
| <b>2</b> | <b>Synthesis and Characterization</b> .....                                                        | <b>4</b>  |
| 2.1      | Al(Si <sup>t</sup> Bu <sub>2</sub> Me) <sub>3</sub> ·K <sup>+</sup> (18-c-6) ( <b>2[K]</b> ) ..... | 4         |
| 2.2      | <sup>t</sup> BuNC·Al(Si <sup>t</sup> Bu <sub>2</sub> Me) <sub>3</sub> ( <b>3</b> ).....            | 5         |
| 2.3      | XyINC·Al(Si <sup>t</sup> Bu <sub>2</sub> Me) <sub>3</sub> ( <b>4</b> ).....                        | 8         |
| 2.4      | AdNC·Al(Si <sup>t</sup> Bu <sub>2</sub> Me) <sub>3</sub> ( <b>5</b> ).....                         | 11        |
| 2.5      | (18-c-6)K-NC·Al(Si <sup>t</sup> Bu <sub>2</sub> Me) <sub>3</sub> ( <b>6</b> ).....                 | 14        |
| 2.6      | CO homologation product <b>7</b> .....                                                             | 20        |
| <b>3</b> | <b>Single-Crystal X-ray Diffraction Analysis</b> .....                                             | <b>24</b> |
| 3.1      | General information.....                                                                           | 24        |
| 3.2      | Molecular structure of <b>3</b> .....                                                              | 26        |
| 3.3      | Molecular structure of <b>4</b> .....                                                              | 27        |
| 3.4      | Molecular structure of <b>5</b> .....                                                              | 29        |
| 3.5      | Molecular structure of <b>6</b> .....                                                              | 31        |
| 3.6      | Molecular structure of <b>7</b> .....                                                              | 32        |
| <b>4</b> | <b>References</b> .....                                                                            | <b>34</b> |

## 1 General Methods and Instrumentation

All experiments were performed in an argon 4.6 ( $\leq 99.996\%$ ; *Westfahlen AG*) atmosphere under the exclusion of  $\text{H}_2\text{O}$  and  $\text{O}_2$  using standard Schlenk- or *LABstar* from *M. Braun Inertgas Systeme GmbH*. The glassware used for the reactions was heat-dried under vacuum before being sealed with Triboflon III grease. Solvent was purified via distillation in an inert gas atmosphere from sodium/ketyl radical, calcium hydride, or potassium mirror, and stored over molecular sieves (3 Å) under Schlenk conditions or in a Glovebox Workstation. Air- and moisture-sensitive compounds and reactions were measured in *J. Young* PTFE NMR tubes. Unless otherwise stated, all commercially available chemicals were purchased from *abcr GmbH* or *Sigma-Aldrich Chemie GmbH* and used without further purification. The starting materials  $\text{HSi}^t\text{Bu}_2\text{Me}$ ,  $\text{BrSi}^t\text{Bu}_2\text{Me}$ ,  $\text{NaSi}^t\text{Bu}_2\text{Me}$ ,  $\text{Al}(\text{Si}^t\text{Bu}_2\text{Me})_3$  (**1**) were prepared according to the literature procedures.<sup>1-4</sup>

The NMR spectra were recorded at room temperature on a Bruker 500 MHz or a Bruker 400 MHz spectrometer. The  $\delta$ -values are stated in parts per million [ppm]. Chemical shifts are referenced to (residual) solvent signal ( $\text{C}_6\text{D}_6$ :  $\delta(^1\text{H}) = 7.16$  ppm and  $\delta(^{13}\text{C}) = 128.06$  ppm).<sup>5</sup> The following abbreviations were used to assign the signals and those for the signal multiplicities: s-singlet, d-doublet, and sep-septet. Coupling constants are stated in Hertz [Hz].

Spectroscopy (LIFDI-MS) was measured directly from an inert atmosphere glovebox with a *Thermo Fisher Scientific Exactive Plus Orbitrap* equipped with an ion source from *Linden CMS*. HR-MS (ESI<sup>+</sup>) analysis was performed on a *Thermo Fisher Scientific Exactive Plus Orbitrap* mass spectrometer equipped with a *Thermo Fischer ESI* source.

Quantitative elemental analyses (EA) were carried out using a *EURO EA (HEKA tech)* instrument equipped with a CHNS combustion analyzer at the Laboratory for Microanalysis at the TUM Catalysis Research Center.

## 2 Synthesis and Characterization

### 2.1 $\text{Al}(\text{Si}^t\text{Bu}_2\text{Me})_3 \cdot \text{K}^+(18\text{-c-}6)$ (**2[K]**)

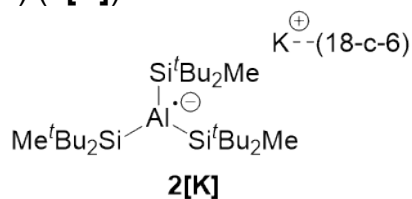

$\text{KC}_8$  (104 mg, 769  $\mu\text{mol}$ , 1.20 eq.) was added to a solution of  $\text{Al}(\text{Si}^t\text{Bu}_2\text{Me})_3$  (**1**, 320 mg, 641  $\mu\text{mol}$ , 1.00 eq.) in THF (10 mL). The reaction mixture was stirred at room temperature for ten hours, during which time it turned deep red. To monitor the reaction progress,  $^1\text{H}$  NMR spectra of the mixture were collected during the reaction. Once the peaks corresponding to the starting material **1** had completely disappeared, the reaction was complete. The mixture was then filtered and the volatiles were removed under reduced pressure. 18-crown-6 (169 mg, 641  $\mu\text{mol}$ , 1.00 eq.) and toluene (10 mL) were subsequently added to the resulting deep red solid. After the mixture was stirred, the solvent was removed under reduced pressure to give compound **2[K]** as a deep red powder. (442 mg, 551  $\mu\text{mol}$ , 86%).

## 2.2 <sup>t</sup>BuNC·Al(Si<sup>t</sup>Bu<sub>2</sub>Me)<sub>3</sub> (**3**)

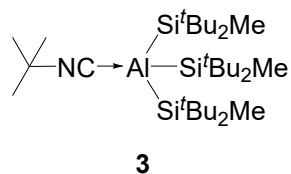

A solution of <sup>t</sup>BuNC (22.7  $\mu$ L, 16.7 mg, 200  $\mu$ mol, 1.00 eq.) in toluene (1 mL) was added to a solution of Al(Si<sup>t</sup>Bu<sub>2</sub>Me)<sub>3</sub> (**1**, 100 mg, 200  $\mu$ mol, 1.00 eq.) in toluene (3 mL) at room temperature. The yellow solution decolorized immediately. After stirring for ten minutes, the solvent was removed under reduced pressure to give compound **3** as a white powder. (111 mg, 191  $\mu$ mol, 95%). Suitable crystals for SC-XRD analysis were obtained by storing a saturated solution of **3** in pentane at  $-30$  °C for several days.

<sup>1</sup>H NMR (400 MHz, C<sub>6</sub>D<sub>6</sub>):  $\delta$  [ppm] = 1.29 (s, 54H, Si<sup>t</sup>Bu), 0.90 (s, 9H, NC<sup>t</sup>Bu), 0.49 (s, 9H, SiMe).

<sup>13</sup>C{<sup>1</sup>H} NMR (126 MHz, C<sub>6</sub>D<sub>6</sub>):  $\delta$  [ppm] = 58.37 (NCMe<sub>3</sub>), 31.41 (SiCMe<sub>3</sub>), 28.45 (NCMe<sub>3</sub>), 22.69 (SiCMe<sub>3</sub>),  $-0.39$  (SiMe).

<sup>29</sup>Si{<sup>1</sup>H} NMR (99 MHz, C<sub>6</sub>D<sub>6</sub>):  $\delta$  [ppm] = 13.68.

Melting point: 114 °C.

Elemental Analysis (%): Calcd: C 66.02, H 12.47, N 2.41; Found: C 65.14, H 12.05, N 2.54.

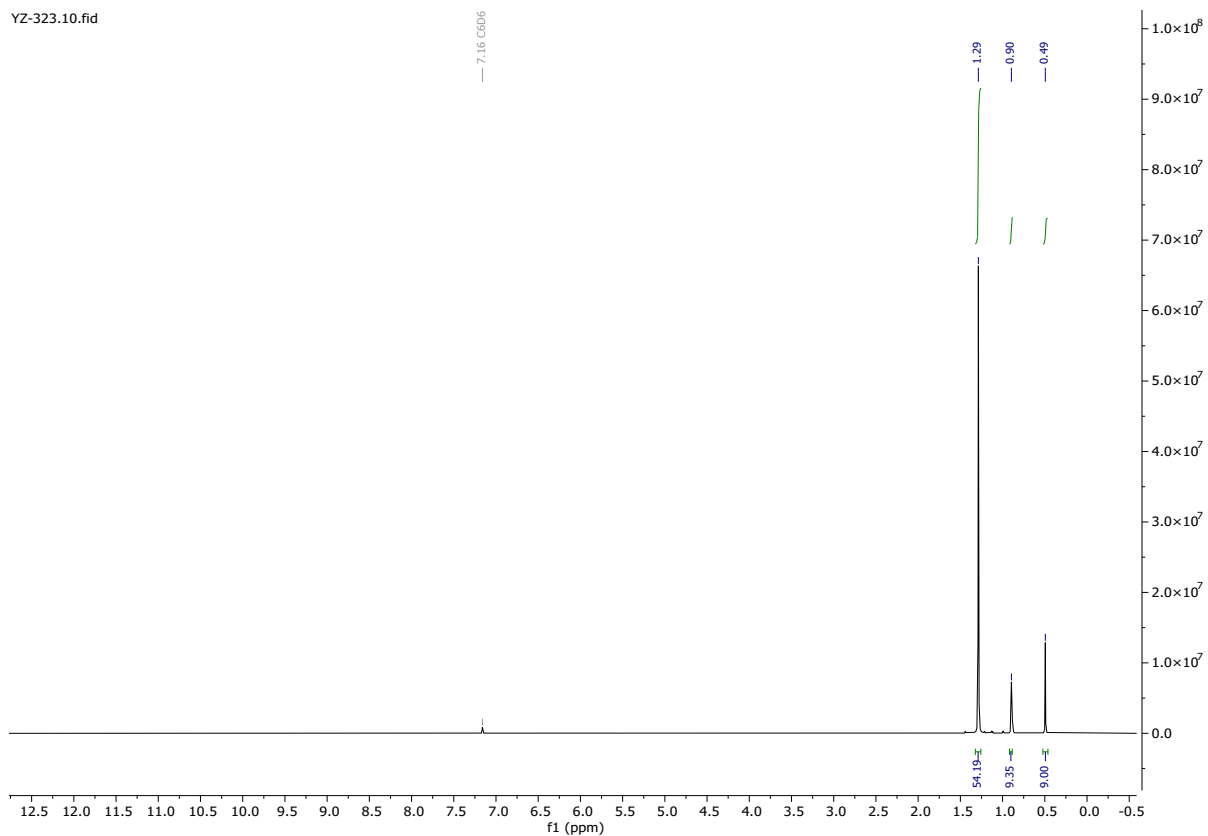

**Figure S1:**  $^1\text{H}$  NMR spectrum of compound **3** in  $\text{C}_6\text{D}_6$  at 298 K.

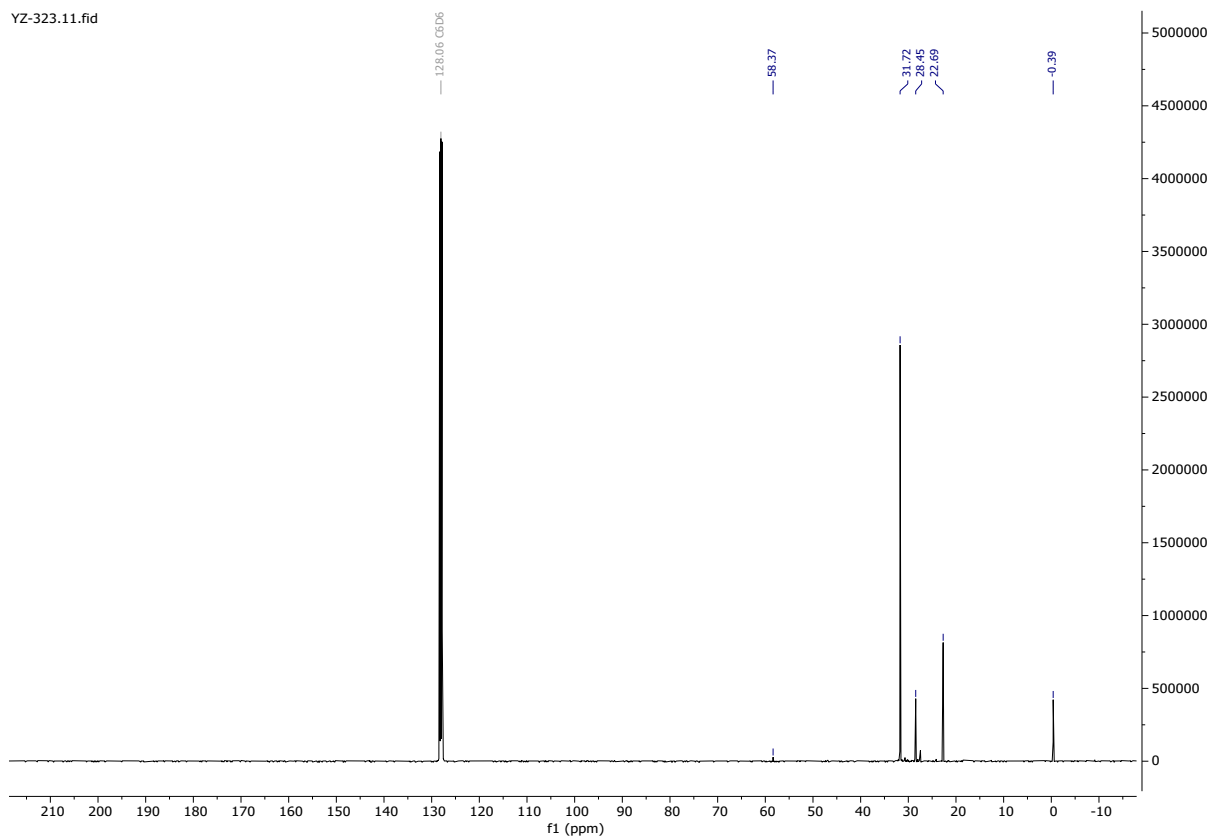

**Figure S2:**  $^{13}\text{C}\{^1\text{H}\}$  NMR spectrum of compound **3** in  $\text{C}_6\text{D}_6$  at 298 K.

YZ-323.15.fid

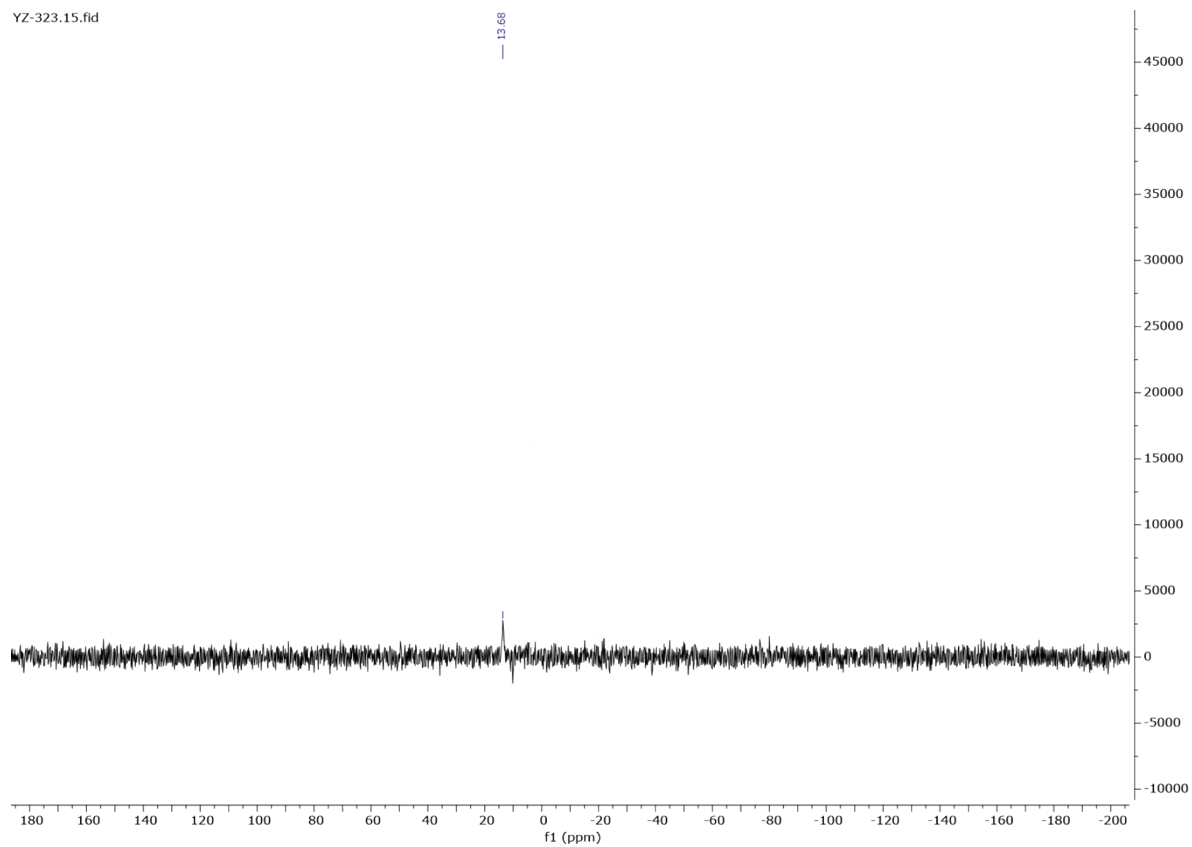

**Figure S3:**  $^{29}\text{Si}\{^1\text{H}\}$  NMR spectrum of compound **3** in  $\text{C}_6\text{D}_6$  at 298 K.

### 2.3 XyINC·Al(Si<sup>t</sup>Bu<sub>2</sub>Me)<sub>3</sub> (**4**)

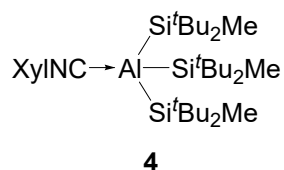

A solution of XyINC (26.3 mg, 200  $\mu\text{mol}$ , 1.00 eq.) in toluene (1 mL) was added to a solution of Al(Si<sup>t</sup>Bu<sub>2</sub>Me)<sub>3</sub> (**1**, 100 mg, 200  $\mu\text{mol}$ , 1.00 eq.) in toluene (3 mL) at room temperature. The yellow solution decolorized immediately. After stirring for ten minutes, the solvent was removed under reduced pressure to give compound **4** as a white powder. (122 mg, 194  $\mu\text{mol}$ , 97%). Suitable crystals for SC-XRD analysis were obtained by storing a saturated solution of **4** in pentane at  $-30\text{ }^\circ\text{C}$  for several days.

<sup>1</sup>H NMR (400 MHz, C<sub>6</sub>D<sub>6</sub>):  $\delta$  [ppm] = 6.68-6.64 (m, 1H, *p*-H), 6.48 (d, *J* = 7.6 Hz, 2H, *m*-H), 2.25 (s, 6H, C<sub>aryl</sub>Me), 1.33 (s, 54H, <sup>t</sup>Bu), 0.09 (s, 6H, SiMe).

<sup>13</sup>C{<sup>1</sup>H} NMR (126 MHz, C<sub>6</sub>D<sub>6</sub>):  $\delta$  [ppm] = 136.20 (*o*-C), 130.59 (*p*-C), 128.92 (*m*-C), 32.15 (SiCMe<sub>3</sub>), 23.25 (SiCMe<sub>3</sub>), 19.53 (C<sub>aryl</sub>Me), 0.09 (SiMe).

<sup>29</sup>Si{<sup>1</sup>H} NMR (99 MHz, C<sub>6</sub>D<sub>6</sub>):  $\delta$  [ppm] = 14.42.

Melting point: 121  $^\circ\text{C}$ .

Elemental Analysis (%): Calcd: C 68.61, H 11.52, N 2.22; Found: C 69.08, H 11.07, N 2.42.

YZ-369.10.fid

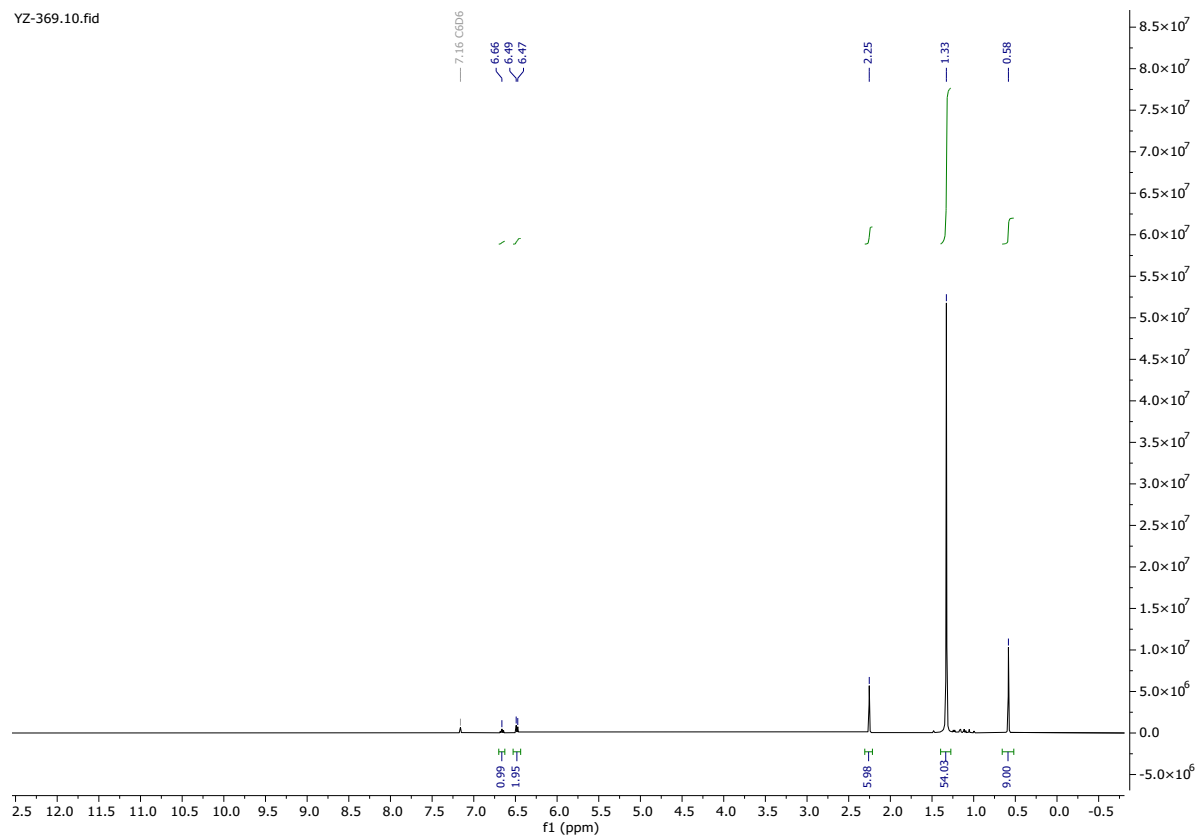

Figure S4: <sup>1</sup>H NMR spectrum of compound 4 in C<sub>6</sub>D<sub>6</sub> at 298 K.

YZ-Al(SitBu2Me)3+XylINC.11.fid

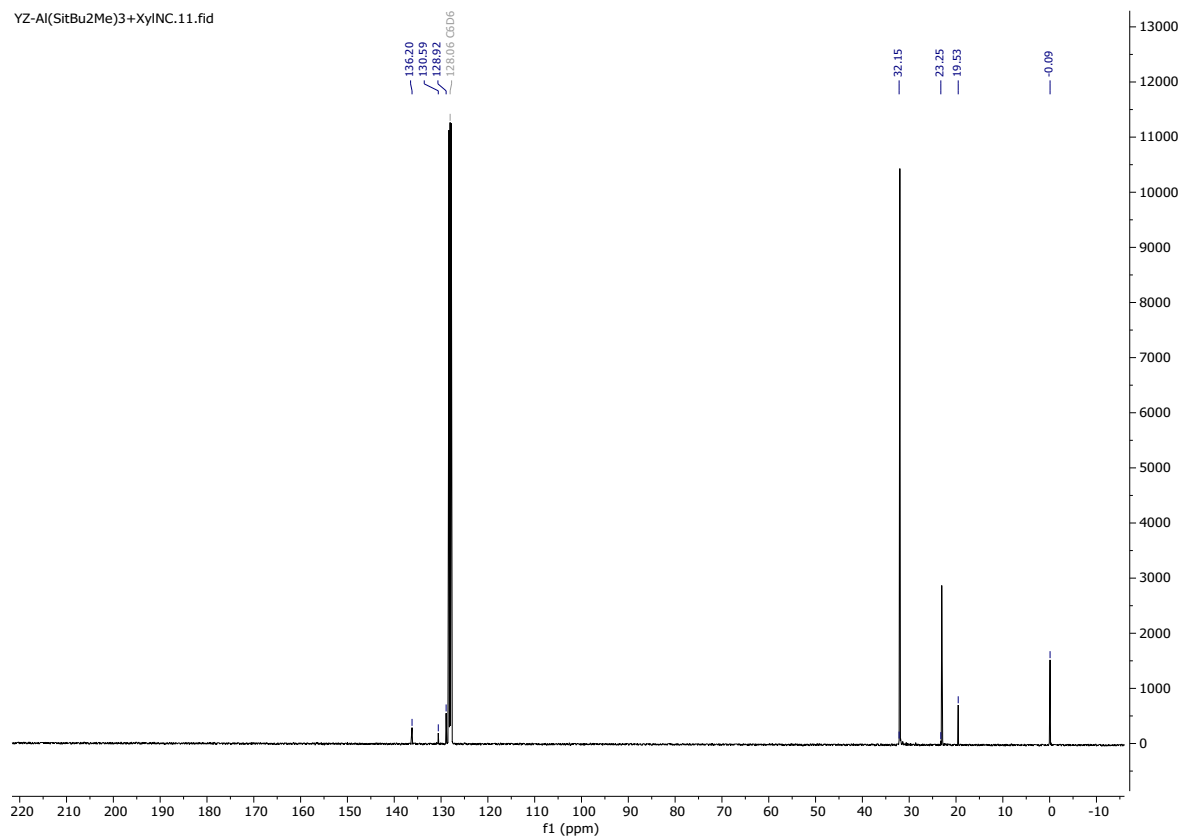

Figure S5: <sup>13</sup>C{<sup>1</sup>H} NMR spectrum of compound 4 in C<sub>6</sub>D<sub>6</sub> at 298 K.

YZ-369.11.fid

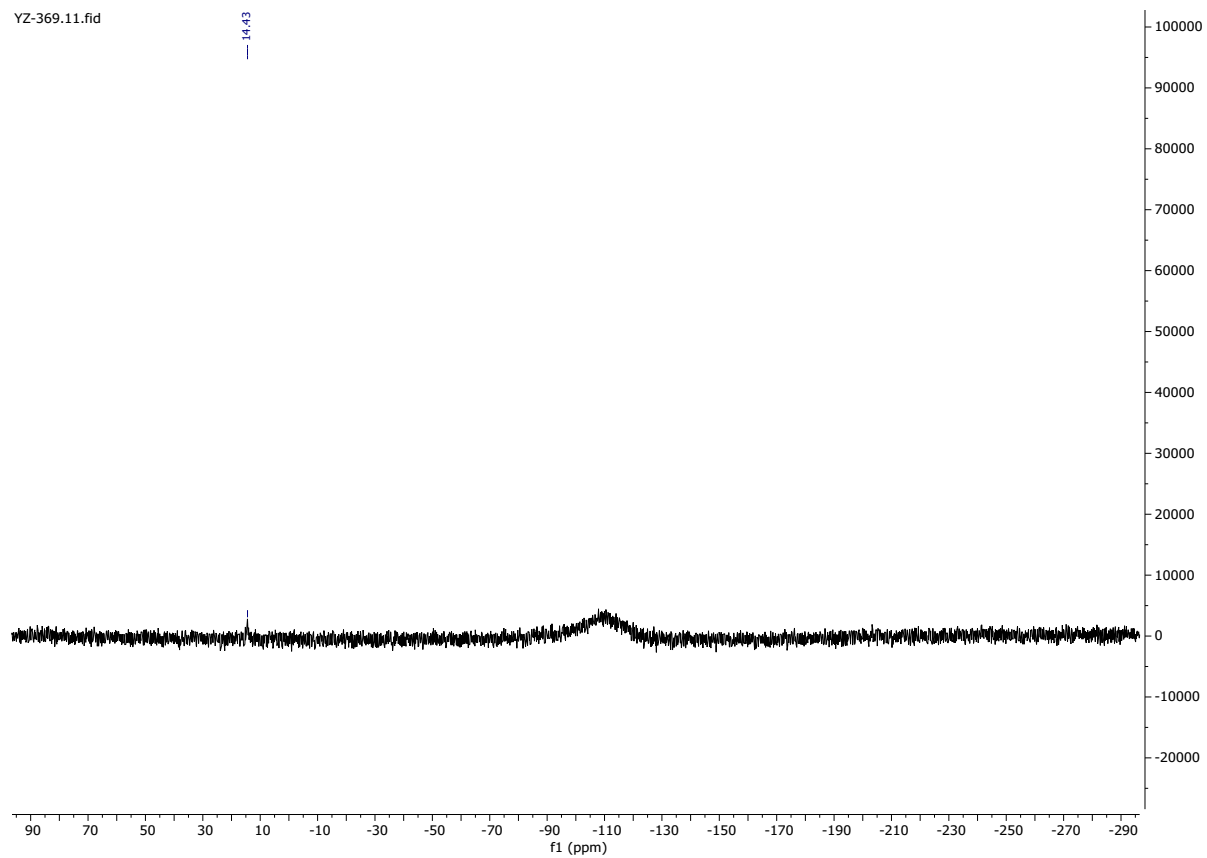

**Figure S6:**  $^{29}\text{Si}\{^1\text{H}\}$  NMR spectrum of compound **4** in  $\text{C}_6\text{D}_6$  at 298 K.

## 2.4 AdNC·Al(Si<sup>t</sup>Bu<sub>2</sub>Me)<sub>3</sub> (**5**)

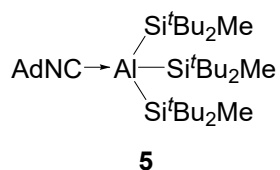

A solution of AdNC (32.3 mg, 200 μmol, 1.00 eq.) in toluene (1 mL) was added to a solution of Al(Si<sup>t</sup>Bu<sub>2</sub>Me)<sub>3</sub> (**1**, 100 mg, 200 μmol, 1.00 eq.) in toluene (3 mL) at room temperature. The yellow solution decolorized immediately. After stirring for ten minutes, the solvent was removed under reduced pressure to give compound **5** as a white powder. (128 mg, 194 μmol, 97%). Suitable crystals for SC-XRD analysis were obtained by storing a saturated solution of **5** in pentane at -30 °C for several days.

<sup>1</sup>H NMR (400 MHz, CDCl<sub>3</sub>): δ [ppm] = 2.16 (s, 3H, C<sub>c</sub>), 2.07 (s, 6H, C<sub>b</sub>), 1.74-1.65 (m, 6H, C<sub>d</sub>), 1.05 (s, 54H, Si<sup>t</sup>Bu), 0.19 (s, 6H, Me).

<sup>13</sup>C{<sup>1</sup>H} NMR (126 MHz, CDCl<sub>3</sub>): δ [ppm] = 58.56 (C<sub>a</sub>), 41.69 (C<sub>b</sub>), 35.31 (C<sub>d</sub>), 31.46 (SiCMe<sub>3</sub>), 28.58 (C<sub>c</sub>), 22.49 (SiCMe<sub>3</sub>), 0.88 (Me).

<sup>29</sup>Si{<sup>1</sup>H} NMR (99 MHz, CDCl<sub>3</sub>): δ [ppm] = 13.34.

Melting point: 142 °C.

Elemental Analysis (%): Calcd: C 69.12, H 11.91, N 2.12; Found: C 66.27, H 13.34, N 1.92.

YZ-363-CDCl3.10.fid

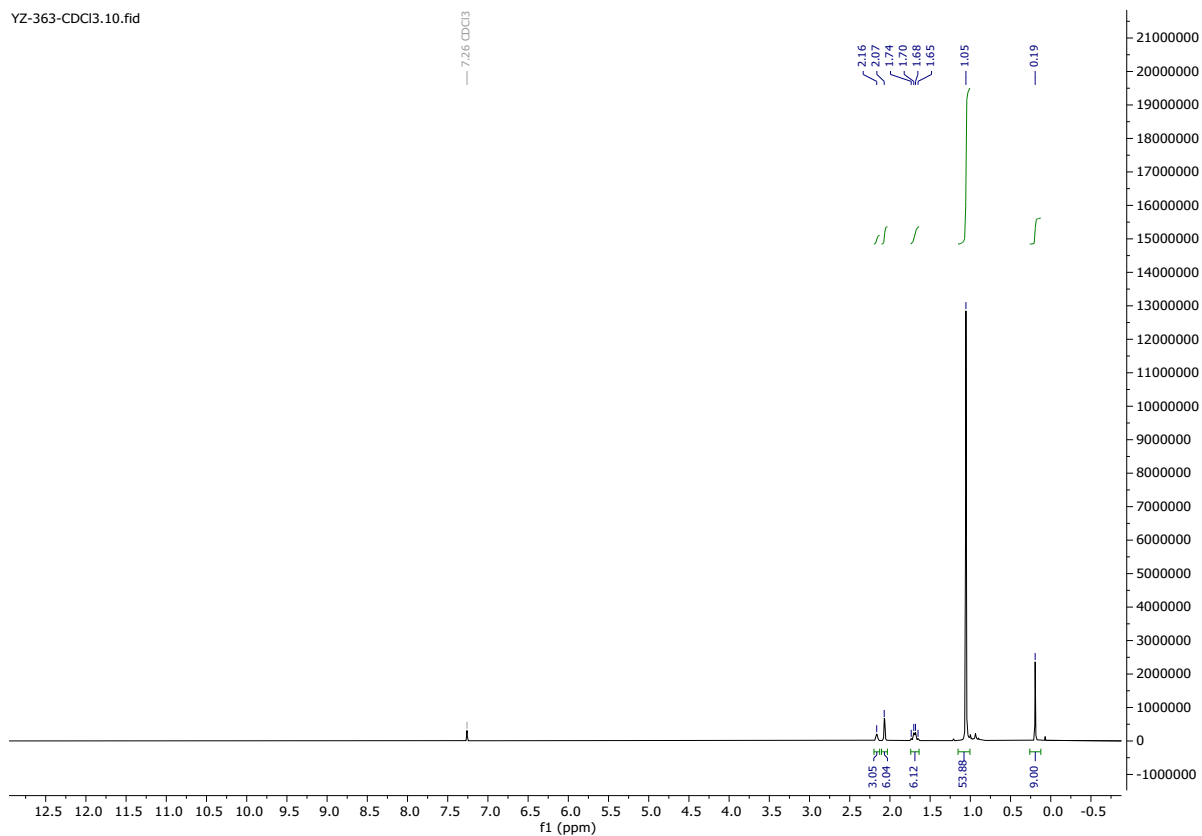

Figure S7: <sup>1</sup>H NMR spectrum of compound **5** in CDCl<sub>3</sub> at 298 K.

YZ-363-CDCl3.11.fid

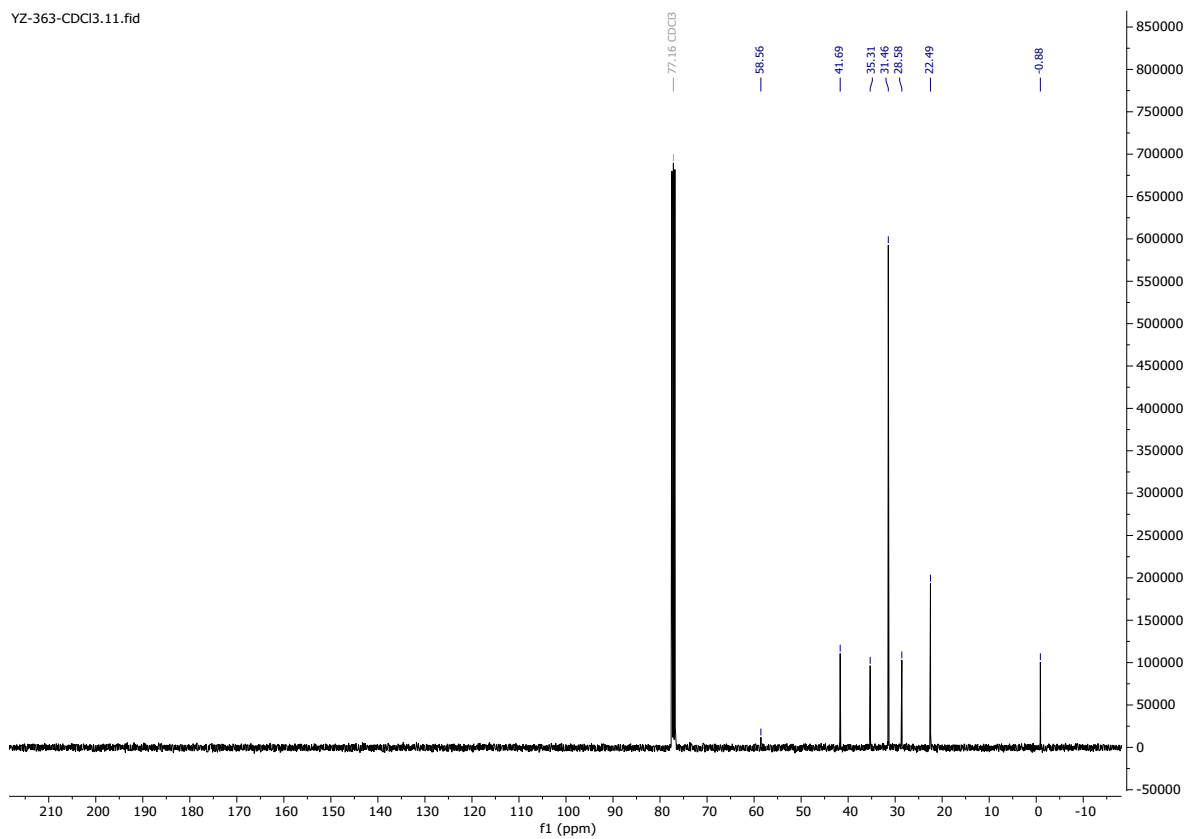

Figure S8: <sup>13</sup>C{<sup>1</sup>H} NMR spectrum of compound **5** in CDCl<sub>3</sub> at 298 K.

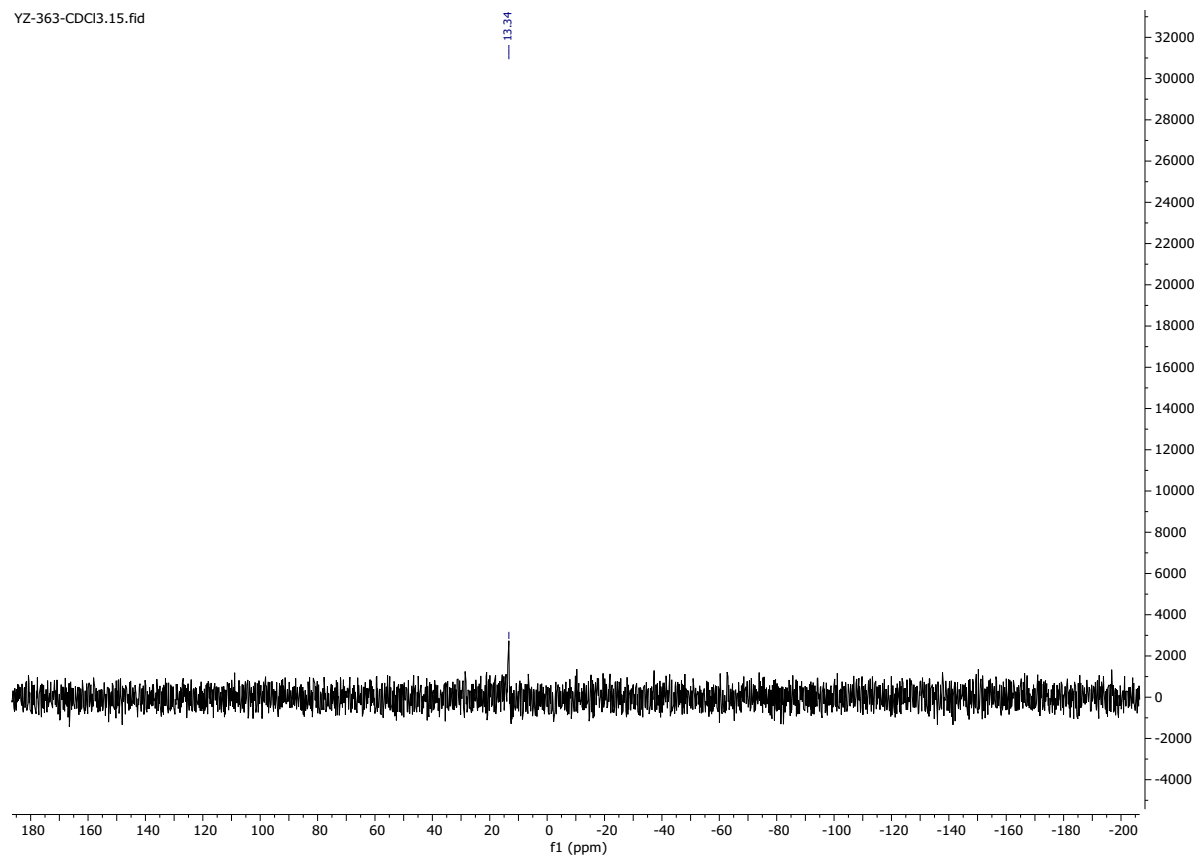

**Figure S9:**  $^{29}\text{Si}\{^1\text{H}\}$  NMR spectrum of compound **5** in  $\text{CDCl}_3$  at 298 K.

## 2.5 (18-c-6)K-NC·Al(Si<sup>t</sup>Bu<sub>2</sub>Me)<sub>3</sub> (**6**)

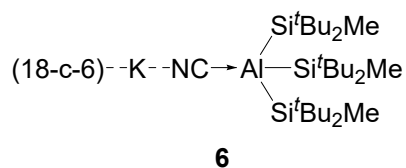

A solution of RNC (R = <sup>t</sup>Bu, 14.1 μL, 10.4 mg, 125 μmol, 1.00 eq.; R = Xyl, 16.4 mg, 125 μmol, 1.00 eq.; R = Ad, 20.1 mg, 125 μmol, 1.00 eq) in toluene (1 mL) was added to a solution of Al(Si<sup>t</sup>Bu<sub>2</sub>Me)<sub>3</sub>K<sup>+</sup>(18-c-6) (**2[K]**, 100 mg, 125 μmol, 1.00 eq.) in THF (3 mL) at room temperature. The deep red solution decolorized immediately. After stirring for ten minutes, the solvent was removed under reduced pressure to give compound **6** as a white powder. (R = <sup>t</sup>Bu, 96.1 mg, 116 μmol, 93%; R = Xyl, 95.2 mg, 115 μmol, 92%; R = Ad, 96.9 mg, 117 μmol, 94%). Suitable crystals for SC-XRD analysis were obtained by storing a saturated solution of **6** in pentane at -30 °C for several days.

<sup>1</sup>H NMR (400 MHz, C<sub>6</sub>D<sub>6</sub>): δ [ppm] = 3.04 (s, 24H, 18-c-6), 1.55 (s, 54H, Si<sup>t</sup>Bu), 0.74 (s, 6H, Me).

<sup>13</sup>C{<sup>1</sup>H} NMR (126 MHz, C<sub>6</sub>D<sub>6</sub>): δ [ppm] = 69.95 (18-c-6), 32.20 (SiCMe<sub>3</sub>), 22.89 (SiCMe<sub>3</sub>), -0.20 (Me).

<sup>29</sup>Si{<sup>1</sup>H} NMR (99 MHz, C<sub>6</sub>D<sub>6</sub>): δ [ppm] = 10.20.

LIFDI-MS (positive ion mode): m/z found: 303.1176 [C<sub>12</sub>H<sub>24</sub>KO<sub>6</sub>]<sup>+</sup>, Anion wasn't detected because of positive ion mode.

YZ-405.20.fid

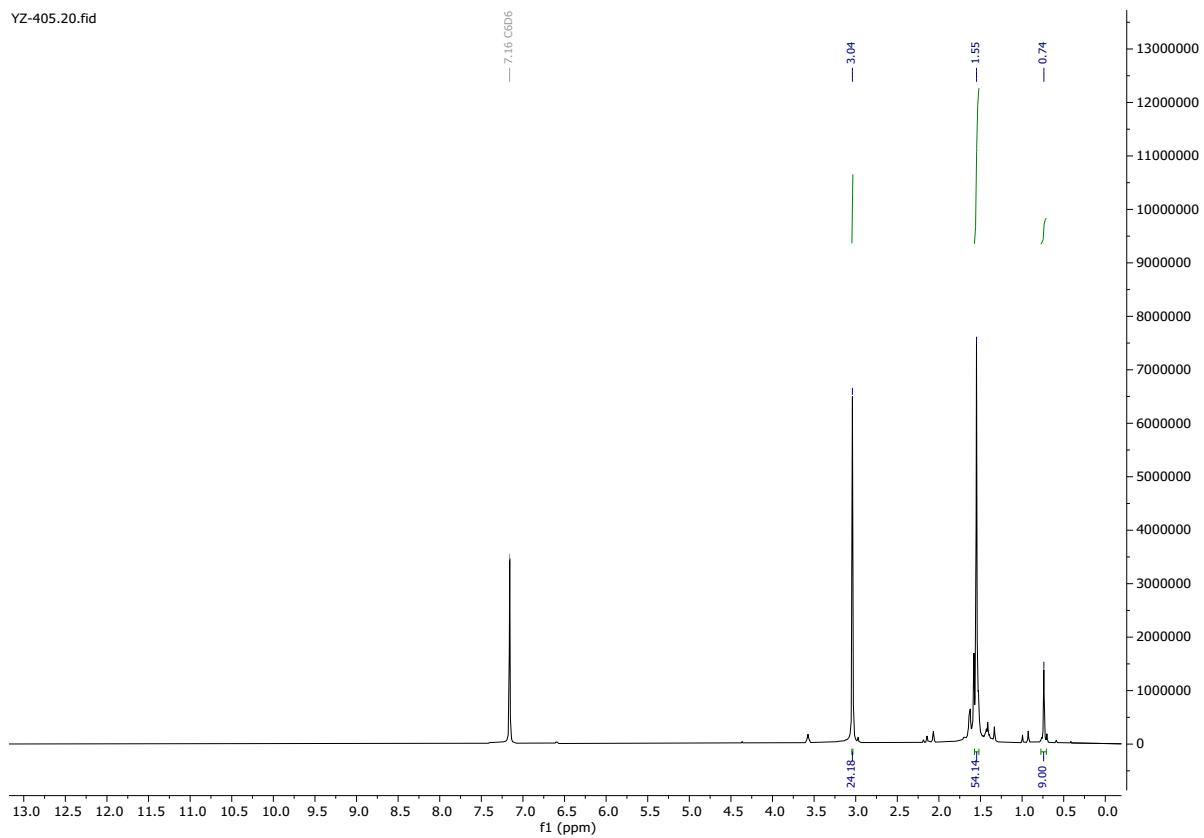

**Figure S10:** <sup>1</sup>H NMR spectrum of compound **6** in C<sub>6</sub>D<sub>6</sub> at 298 K.

YZ-405-150425.11.fid

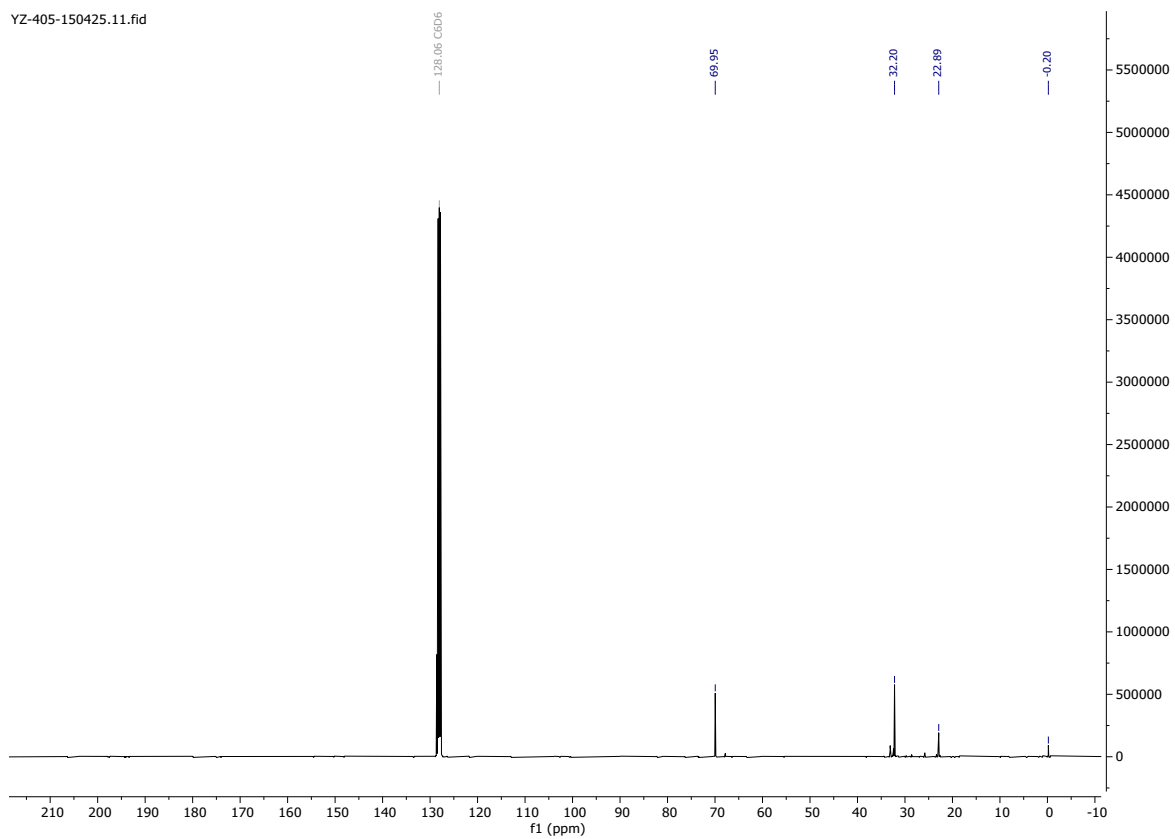

**Figure S11:**  $^{13}\text{C}\{^1\text{H}\}$  NMR spectrum of compound **6** in  $\text{C}_6\text{D}_6$  at 298 K.

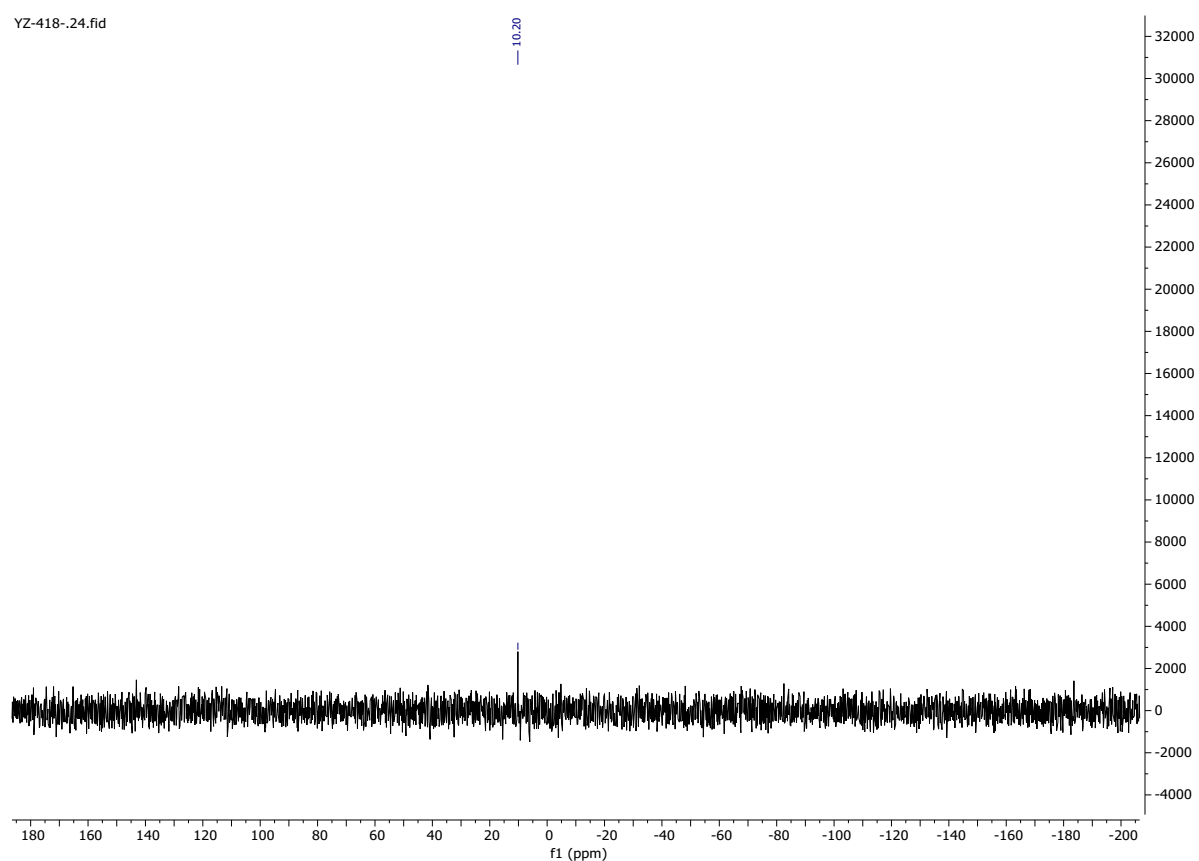

**Figure S12:**  $^{29}\text{Si}\{^1\text{H}\}$  NMR spectrum of compound **6** in  $\text{C}_6\text{D}_6$  at 298 K.

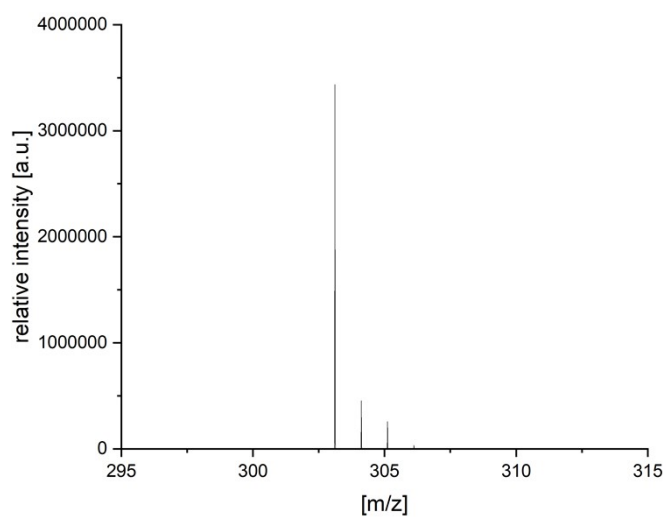

**Figure S13:** LIFDI-MS spectrometry (detail view with isotopic pattern) of **6**. Measured  $m/z = 303.1176$   
 $[\text{C}_{12}\text{H}_{24}\text{KO}_6]^+$ .

# $^1\text{H}$ NMR spectra of the reaction mixture of **2[K]** and $t\text{BuNC}$

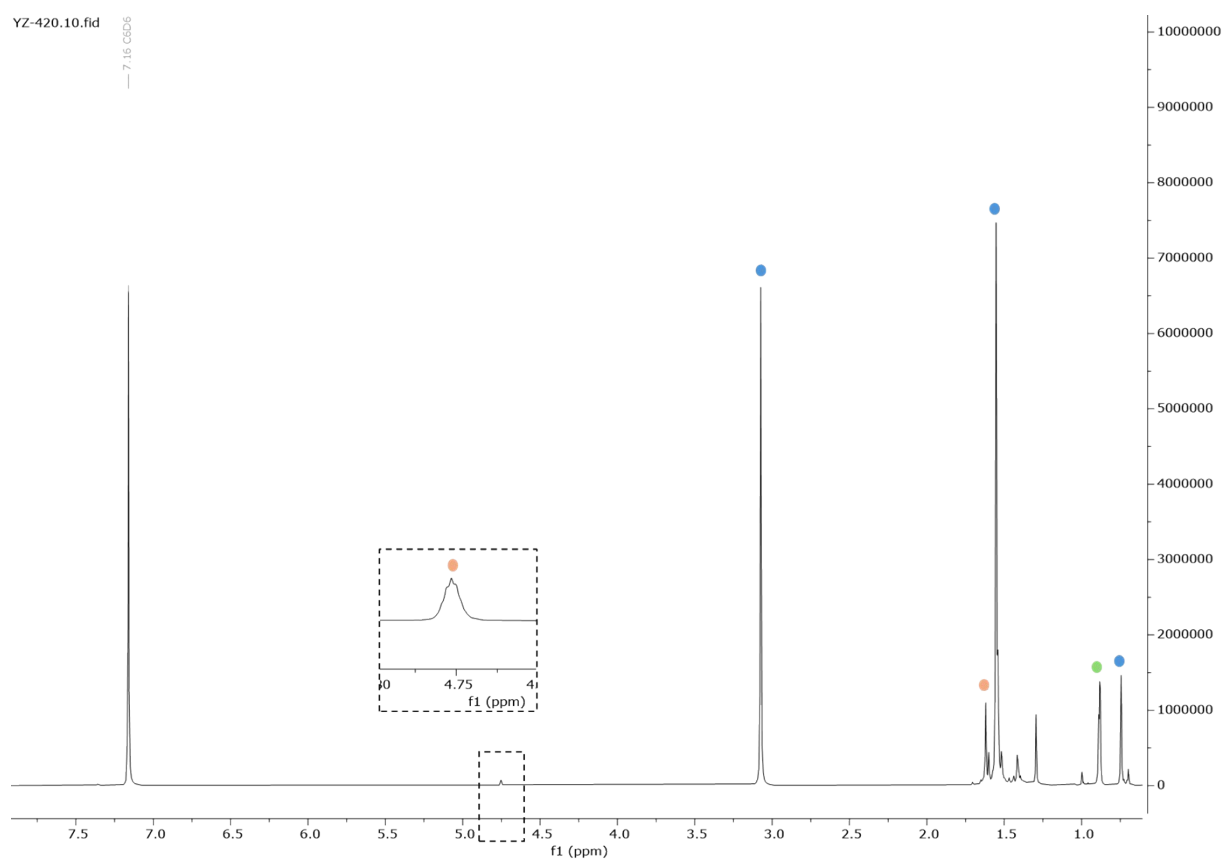

**Figure S14:**  $^1\text{H}$  NMR spectrum of the reaction mixture of **2[K]** and  $t\text{BuNC}$  (blue: **6**; orange: isobutylene; green:  $t\text{BuNC}$ ).

# $^1\text{H}$ NMR spectra of the reaction mixture of **2[K]** and XylINC

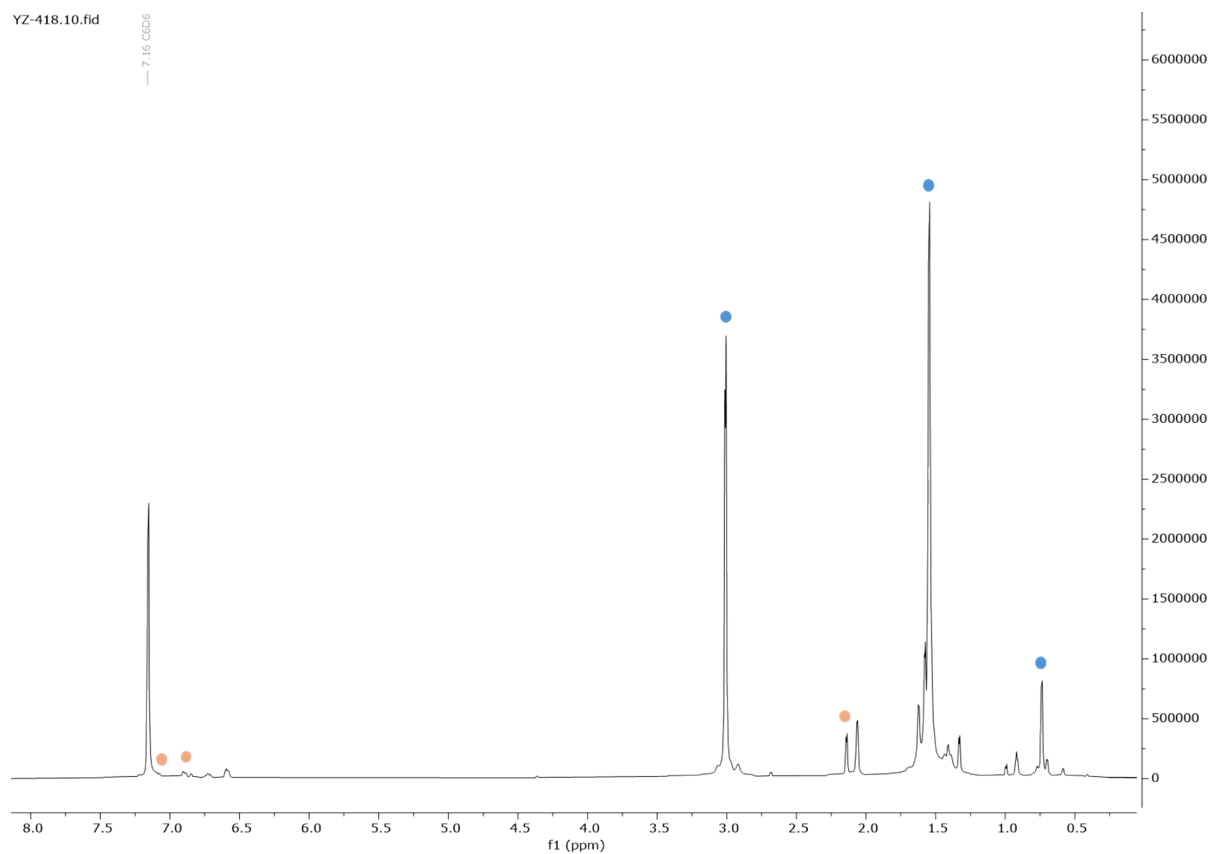

**Figure S15:**  $^1\text{H}$  NMR spectrum of the reaction mixture of **2[K]** and XylINC (blue: **6**; orange: *m*-xylene).

# $^1\text{H}$ NMR spectra of the reaction mixture of **2[K]** and AdNC

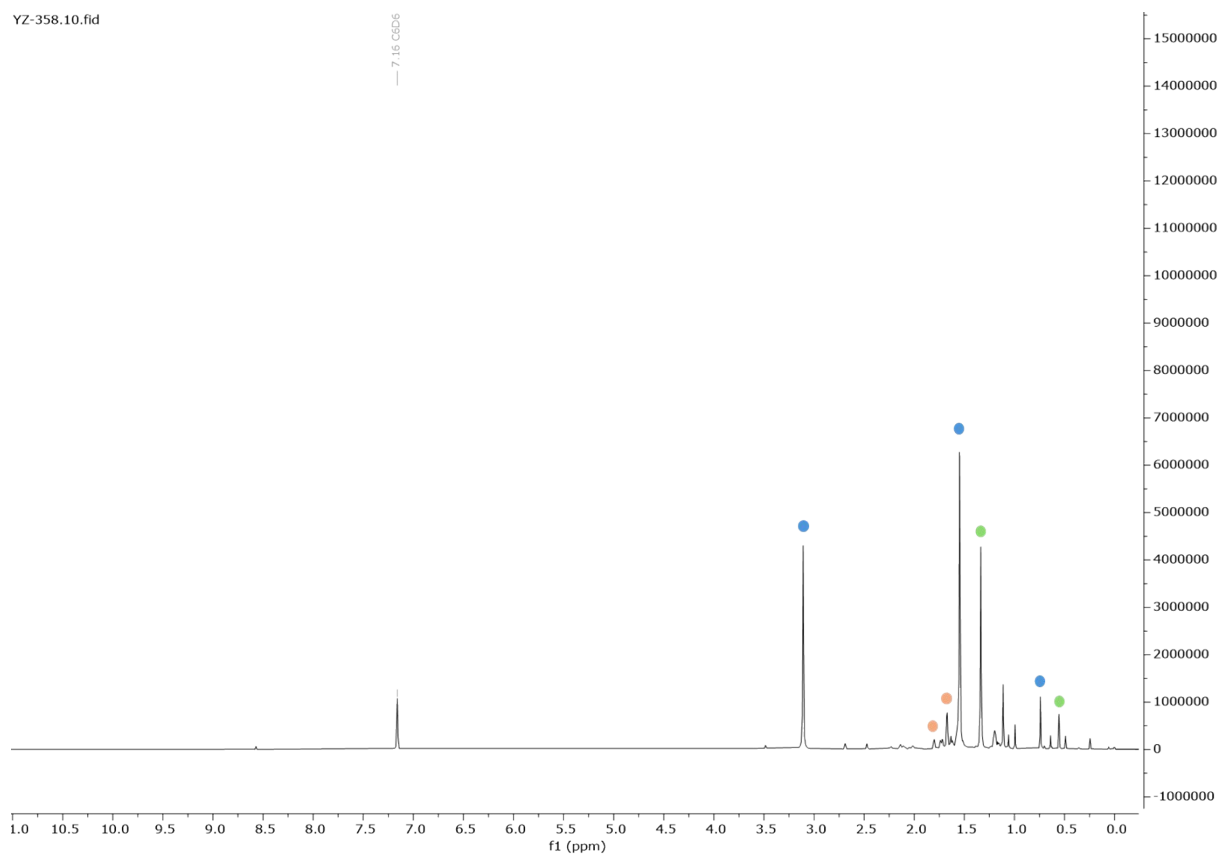

**Figure S16:**  $^1\text{H}$  NMR spectrum of the reaction mixture of **2[K]** and AdNC (blue: **6**; orange: adamantane; green:  $\text{Al}(\text{Si}^i\text{Bu}_2\text{Me})_3$ ).

## 2.6 CO homologation product **7**

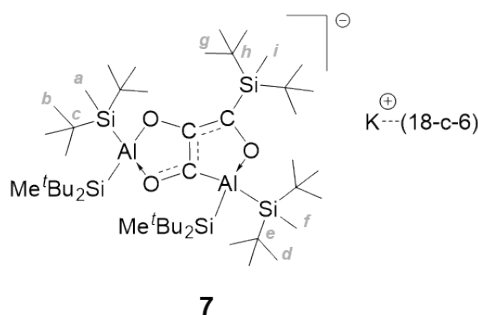

A degassed solution of  $\text{Al}(\text{Si}^t\text{Bu}_2\text{Me})_3\text{-K}^+(18\text{-c-6})$  (**2[K]**, 25.0 mg, 31.2  $\mu\text{mol}$ , 1.00 eq.) in THF in a *J. Young* NMR tube was pressed with CO at room temperature. The deep red solution turned orange. The reaction mixture was concentrated and stored at  $-30\text{ }^\circ\text{C}$  for several days to give compound **7** as an orange crystal (7.51 mg, 6.11  $\mu\text{mol}$ , 39%). The crystals are suitable for SC-XRD analysis.

$^1\text{H}$  NMR (400 MHz,  $\text{THF-}d_8$ ):  $\delta$  [ppm] = 3.62 (s, 24H, 18-c-6), 1.12 (s, 18H,  $\text{H}^g$ ), 1.00-0.98 (m, 72H,  $\text{H}^b$  and  $\text{H}^d$ ), 0.27 (s, 3H,  $\text{H}^i$ ),  $-0.02$  (s, 12H,  $\text{H}^b$  and  $\text{H}^f$ ).

$^{13}\text{C}\{^1\text{H}\}$  NMR (126 MHz,  $\text{THF-}d_8$ ):  $\delta$  [ppm] = 192.48 (s,  $\text{C}^j$ ), 175.56 (s,  $\text{C}^k$ ), 71.39 (s, 18-c-6), 31.87 (d,  $J = 11.3$  Hz,  $\text{C}^b$ ), 31.58 (d,  $J = 14.5$  Hz,  $\text{C}^d$ ), 30.30 (s,  $\text{C}^g$ ), 22.13 (d,  $J = 11.3$  Hz,  $\text{C}^e$ ), 21.69 (s,  $\text{C}^c$ ), 20.79 (s,  $\text{C}^h$ ),  $-3.51$  (s,  $\text{C}^a$ ),  $-4.03$  (s,  $\text{C}^f$ ),  $-6.87$  (s,  $\text{C}^i$ ).

$^{29}\text{Si}\{^1\text{H}\}$  NMR (99 MHz,  $\text{THF-}d_8$ ):  $\delta$  [ppm] = 5.06 (s,  $\text{C}^f\text{Si}$ ), 4.47 (s,  $\text{C}^j\text{Si}$ ),  $-4.42$  (s,  $\text{C}^a\text{Si}$ ). (Signals were assigned using the  $^{29}\text{Si}$ -HMBC spectrum.)

LIFDI-MS (positive ion mode):  $m/z$  found: 303.1203 [ $\text{C}_{12}\text{H}_{24}\text{KO}_6$ ] $^+$ , Anion wasn't detected because of positive ion mode.

YZ-AIS13KCO-2recry.10.fid

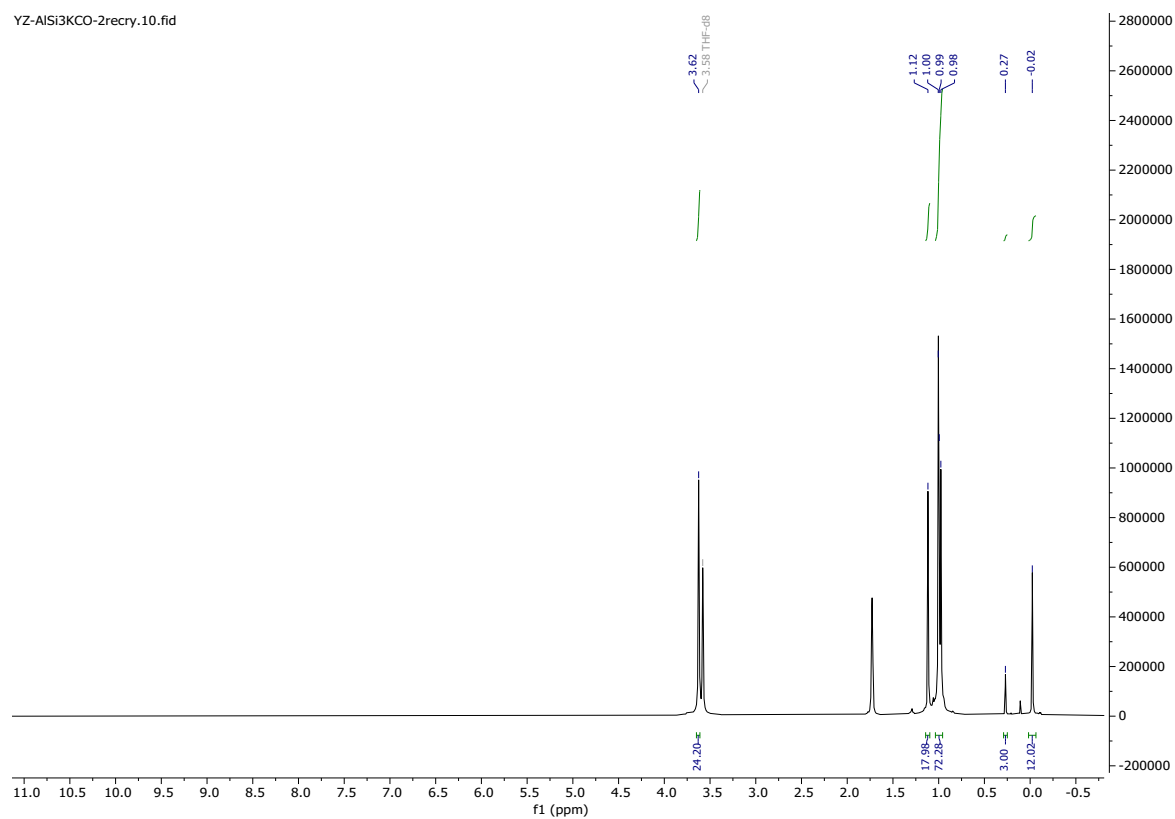

Figure S17:  $^1\text{H}$  NMR spectrum of compound 7 in THF- $d_8$  at 298 K.

YZ-AIS13KCO-2recry.11.fid

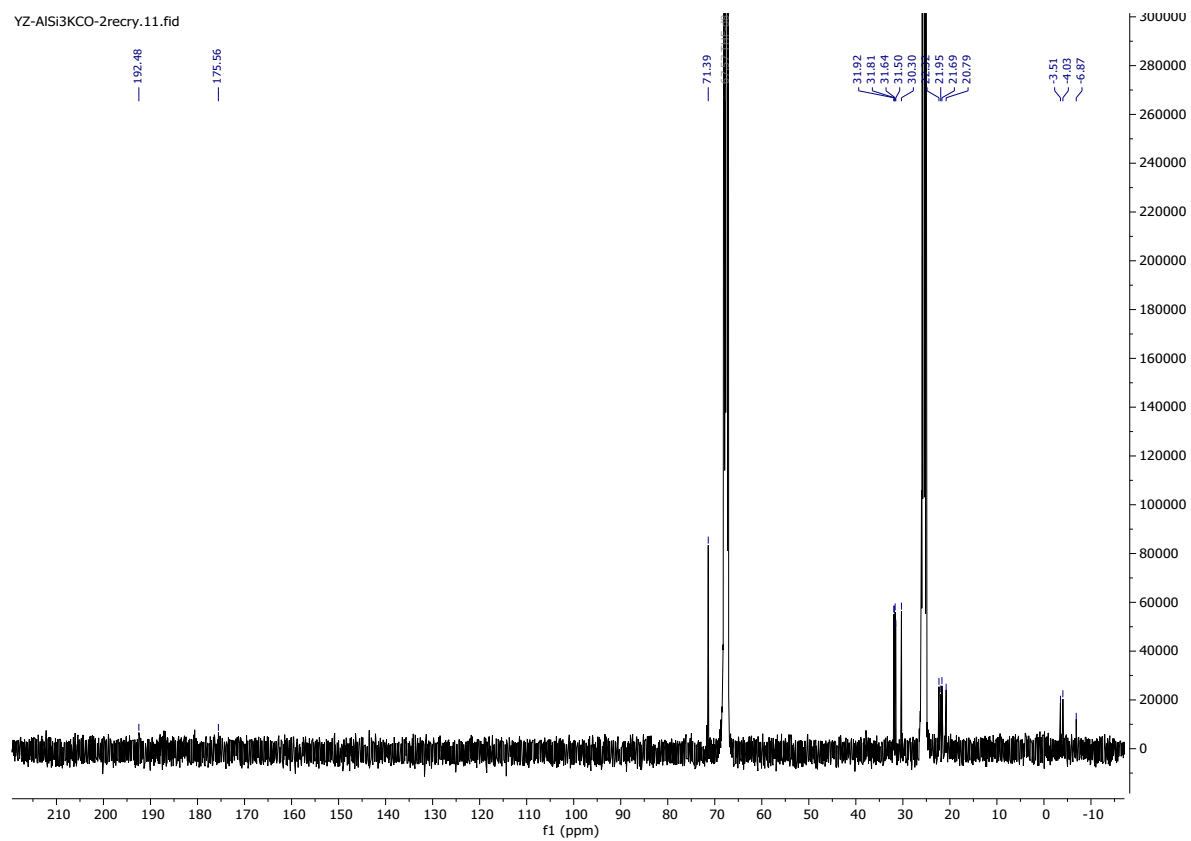

Figure S18:  $^{13}\text{C}\{^1\text{H}\}$  NMR spectrum of compound 7 in THF- $d_8$  at 298 K.

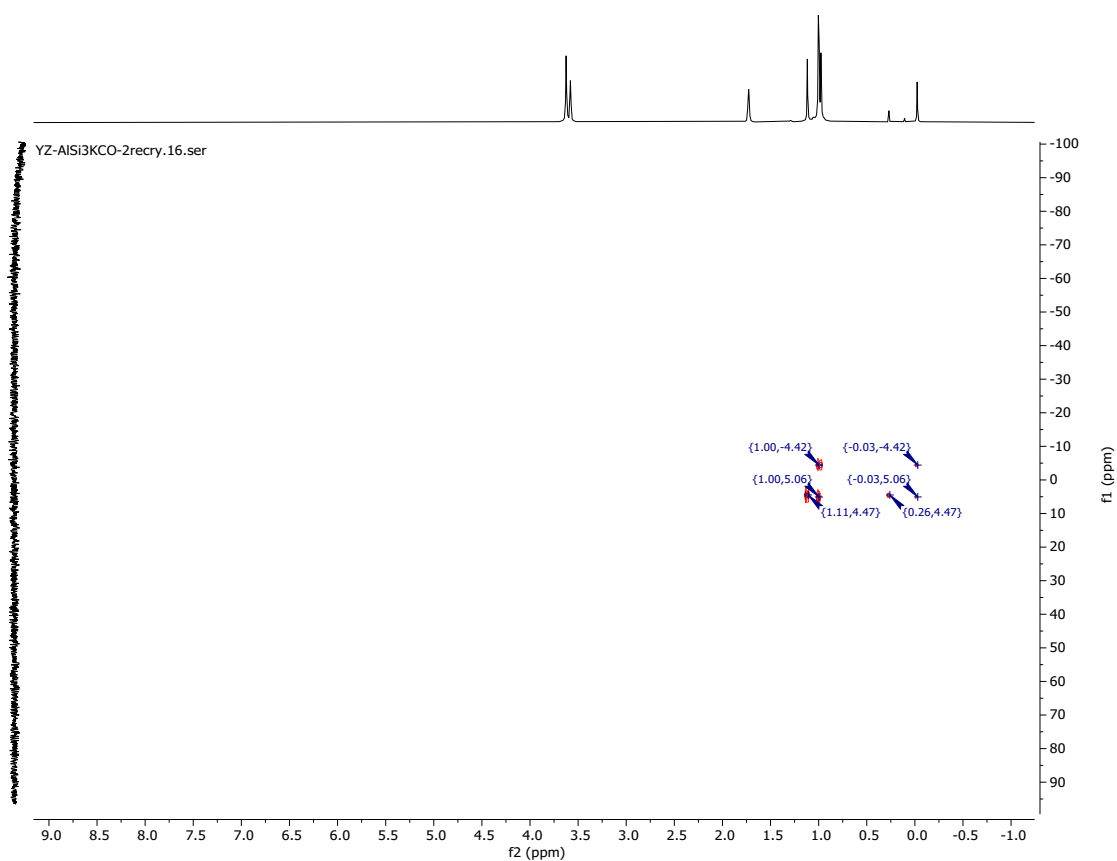

**Figure S19:**  $^{29}\text{Si}\{^1\text{H}\}$  HMBC spectrum of compound **7** in  $\text{THF-}d_8$  at 298 K.

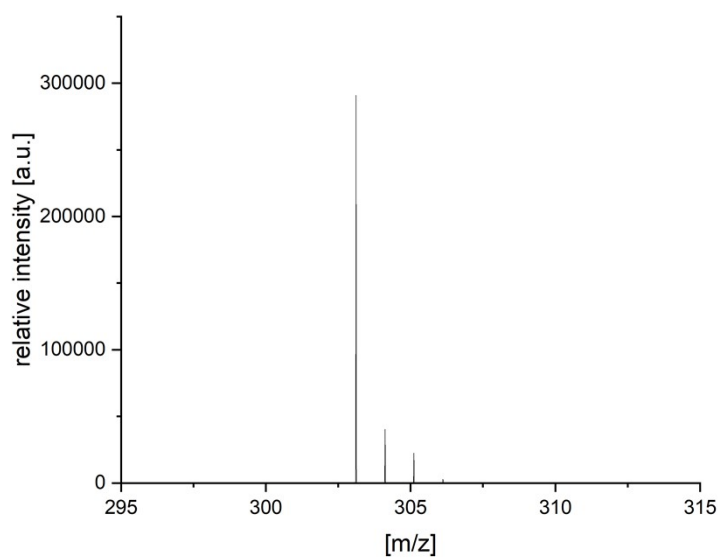

**Figure S20:** LIFDI-MS spectrometry (detail view with isotopic pattern) of **7**. Measured  $m/z = 303.1203$   
 $[\text{C}_{12}\text{H}_{24}\text{KO}_6]^+$ .

# $^1\text{H}$ NMR spectra of the crude reaction mixture of **2[K]** and CO

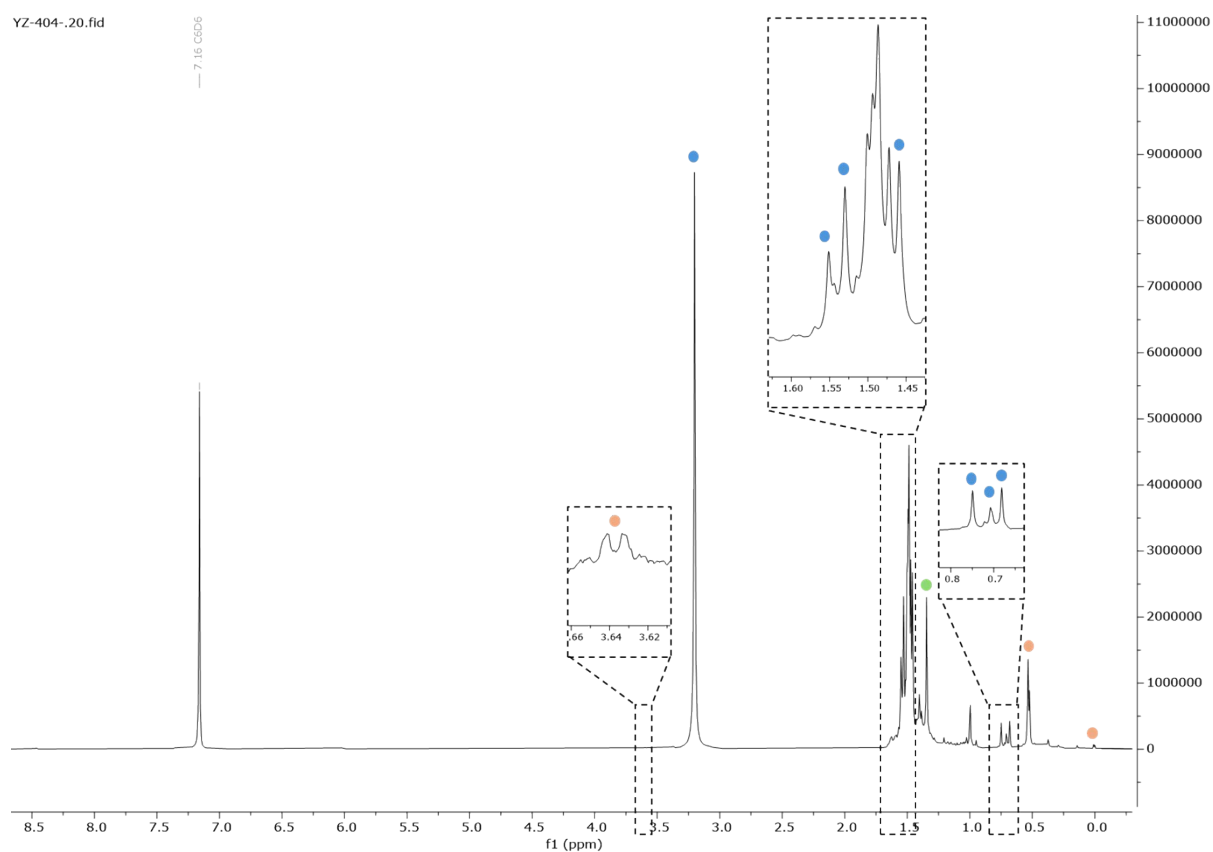

**Figure S21:**  $^1\text{H}$  NMR spectrum of the crude reaction mixture of **2[K]** and CO (blue: compound **7**; orange:  $\text{HSi}^i\text{Bu}_2\text{Me}$ , green:  $\text{Al}(\text{Si}^i\text{Bu}_2\text{Me})_3$  (**1**)).

### 3 Single-Crystal X-ray Diffraction Analysis

#### 3.1 General information

The X-ray intensity data were collected on an X-ray single crystal diffractometer equipped with a CMOS detector (Bruker Photon-100), a rotating anode (Bruker TXS) with MoK $\alpha$  radiation ( $\lambda = 0.71073 \text{ \AA}$ ) and a Helios mirror optic by using the APEX4 software package or an X-ray single crystal diffractometer equipped with a CMOS detector (Bruker Photon-100), an IMS microsource with MoK $\alpha$  radiation ( $\lambda = 0.71073 \text{ \AA}$ ) and a Helios mirror optic by using the APEX4 software package.<sup>6</sup> The measurement was performed on single crystals coated with perfluorinated ether. The crystal was fixed on the top of a microsampler, transferred to the diffractometer and measured under a stream of cold nitrogen. A matrix scan was used to determine the initial lattice parameters. Reflections were merged and corrected for Lorentz and polarization effects, scan speed, and background using SAINT. Absorption corrections, including odd and even ordered spherical harmonics, were performed using SADABS.<sup>7</sup> Space group assignments were based on systematic absences, E statistics, and successful refinement of the structures. Structures were solved by direct methods with the aid of successive difference Fourier maps and were refined against all data using the APEX4<sup>8</sup> in conjunction with SHELXL-2018/3.<sup>9, 10</sup> and SHELXLE.<sup>11</sup> Methyl hydrogen atoms were refined as part of rigid rotating groups, with a C–H distance of 0.98  $\text{\AA}$  and  $U_{iso}(\text{H}) = 1.5 \cdot U_{eq}(\text{C})$ . Other H atoms were placed in calculated positions and refined using a riding model, with methylene and aromatic C–H distances of 0.99 and 0.95  $\text{\AA}$ , respectively, and  $U_{iso}(\text{H}) = 1.2 \cdot U_{eq}(\text{C})$ . If not mentioned otherwise, non-hydrogen atoms were refined with anisotropic displacement parameters. Full-matrix least-squares refinements were carried out by minimizing  $\Delta w(\text{Fo}^2 - \text{Fc}^2)^2$  with SHELXL-97<sup>12</sup> weighting scheme. Neutral atom scattering factors for all atoms and anomalous dispersion corrections for the non-hydrogen atoms were taken from International Tables for Crystallography.<sup>13</sup> Refinement afforded using the function SQUEEZE/Platon<sup>14</sup>, a volume of 241  $\text{\AA}^3$  in 1 void per unit cell for one benzene molecule per asymmetric unit was found. Images of the crystal structures were generated by PLATON and MERCURY.<sup>15, 16</sup> The CCDC numbers CCDC 2543012, 2543016 and 2543019 contain the supplementary

crystallographic data for structure **4**, **5** and **7**. These data can be obtained free of charge from the Cambridge Crystallographic Data Centre via <https://www.ccdc.cam.ac.uk/structures/>. The CIF files were generated using FinalCif.<sup>17</sup>

### 3.2 Molecular structure of **3**

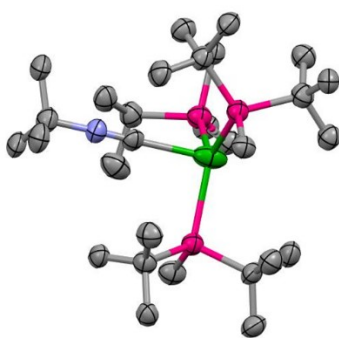

**Figure S22:** Connectivity of **3**.

### 3.3 Molecular structure of **4**

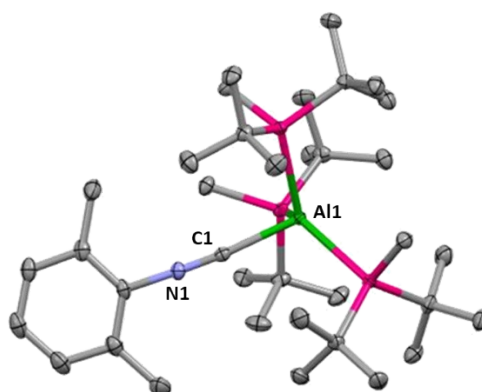

**Figure S23:** Molecular structure of **4**. Thermal ellipsoids are shown at a 50% probability level. H atoms are omitted for clarity. Selected bond lengths [Å] and angles [°]: C1-Al1 2.093(1), N1-C1-Al1 169.93(9).

**Table S1:** Crystallographic details of **4**.

|                                            |                                                                   |
|--------------------------------------------|-------------------------------------------------------------------|
| <b>CCDC number</b>                         | 2543012                                                           |
| <b>Empirical formula</b>                   | C <sub>36</sub> H <sub>72</sub> AlNSi <sub>3</sub>                |
| <b>Formula weight</b>                      | 630.19                                                            |
| <b>Temperature [K]</b>                     | 100                                                               |
| <b>Crystal system</b>                      | monoclinic                                                        |
| <b>Space group (number)</b>                | <i>P</i> 2 <sub>1</sub> / <i>n</i> (14)                           |
| <b><i>a</i> [Å]</b>                        | 13.0203(13)                                                       |
| <b><i>b</i> [Å]</b>                        | 17.9076(16)                                                       |
| <b><i>c</i> [Å]</b>                        | 17.2429(18)                                                       |
| <b>α [°]</b>                               | 90                                                                |
| <b>β [°]</b>                               | 95.970(4)                                                         |
| <b>γ [°]</b>                               | 90                                                                |
| <b>Volume [Å<sup>3</sup>]</b>              | 3998.6(7)                                                         |
| <b><i>Z</i></b>                            | 4                                                                 |
| <b>ρ<sub>calc</sub> [gcm<sup>-3</sup>]</b> | 1.047                                                             |
| <b>μ [mm<sup>-1</sup>]</b>                 | 0.164                                                             |
| <b><i>F</i>(000)</b>                       | 1400                                                              |
| <b>Radiation</b>                           | MoK <sub>α</sub> (λ = 0.71073 Å)                                  |
| <b>2θ range [°]</b>                        | 3.74 to 51.38                                                     |
| <b>Index ranges</b>                        | -15 ≤ <i>h</i> ≤ 15<br>-21 ≤ <i>k</i> ≤ 21<br>-21 ≤ <i>l</i> ≤ 21 |

|                                                                      |                                   |
|----------------------------------------------------------------------|-----------------------------------|
| <b>Independent reflections</b>                                       | 7565                              |
| <b>Completeness to <math>\theta = 25.242^\circ</math></b>            | 0.995                             |
| <b>Data / Restraints / Parameters</b>                                | 7565 / 104 / 471                  |
| <b>Absorption correction <math>T_{\min}/T_{\max}</math> (method)</b> | 0.720 / 0.745 (multi-scan)        |
| <b>Goodness-of-fit on <math>F^2</math></b>                           | 1.053                             |
| <b>Final <math>R</math> indexes [<math>I \geq 2\sigma(I)</math>]</b> | $R_1 = 0.0283$<br>$wR_2 = 0.0769$ |

### 3.4 Molecular structure of **5**

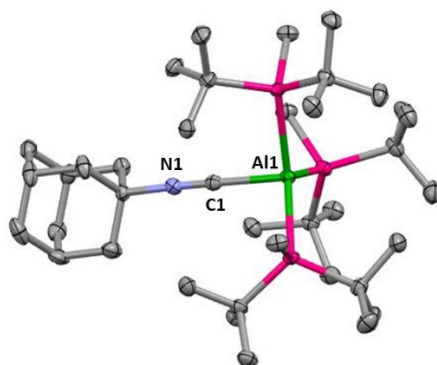

**Figure S24:** Molecular structure of **5**. Thermal ellipsoids are shown at a 50% probability level. H atoms are omitted for clarity. Selected bond lengths [Å] and angles [°]: C1-Al1 2.086(2), N1-C1-Al1 177.3(2).

**Table S2:** Crystallographic details of **5**.

|                                            |                                                                   |
|--------------------------------------------|-------------------------------------------------------------------|
| <b>CCDC number</b>                         | 2543016                                                           |
| <b>Empirical formula</b>                   | C <sub>38</sub> H <sub>78</sub> AlNSi <sub>3</sub>                |
| <b>Formula weight</b>                      | 660.26                                                            |
| <b>Temperature [K]</b>                     | 100                                                               |
| <b>Crystal system</b>                      | monoclinic                                                        |
| <b>Space group (number)</b>                | <i>P</i> 2 <sub>1</sub> / <i>c</i> (14)                           |
| <b><i>a</i> [Å]</b>                        | 13.7786(17)                                                       |
| <b><i>b</i> [Å]</b>                        | 13.5158(17)                                                       |
| <b><i>c</i> [Å]</b>                        | 22.678(3)                                                         |
| <b>α [°]</b>                               | 90                                                                |
| <b>β [°]</b>                               | 96.784(5)                                                         |
| <b>γ [°]</b>                               | 90                                                                |
| <b>Volume [Å<sup>3</sup>]</b>              | 4193.7(9)                                                         |
| <b><i>Z</i></b>                            | 4                                                                 |
| <b>ρ<sub>calc</sub> [gcm<sup>-3</sup>]</b> | 1.046                                                             |
| <b>μ [mm<sup>-1</sup>]</b>                 | 0.159                                                             |
| <b><i>F</i>(000)</b>                       | 1472                                                              |
| <b>Radiation</b>                           | MoK <sub>α</sub> (λ=0.71073 Å)                                    |
| <b>2θ range [°]</b>                        | 4.47 to 52.91                                                     |
| <b>Index ranges</b>                        | -17 ≤ <i>h</i> ≤ 17<br>-16 ≤ <i>k</i> ≤ 16<br>-28 ≤ <i>l</i> ≤ 28 |

|                                                                      |                                   |
|----------------------------------------------------------------------|-----------------------------------|
| <b>Independent reflections</b>                                       | 8591                              |
| <b>Completeness to <math>\theta = 25.242^\circ</math></b>            | 99.4 %                            |
| <b>Data / Restraints / Parameters</b>                                | 8591 / 0 / 409                    |
| <b>Absorption correction <math>T_{\min}/T_{\max}</math> (method)</b> | 0.680 / 0.745 (multi-scan)        |
| <b>Goodness-of-fit on <math>F^2</math></b>                           | 1.203                             |
| <b>Final <math>R</math> indexes [<math>I \geq 2\sigma(I)</math>]</b> | $R_1 = 0.0465$<br>$wR_2 = 0.1487$ |

### 3.5 Molecular structure of **6**

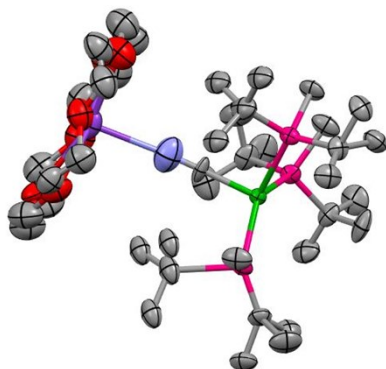

**Figure S25:** Connectivity of **6**.

### 3.6 Molecular structure of 7

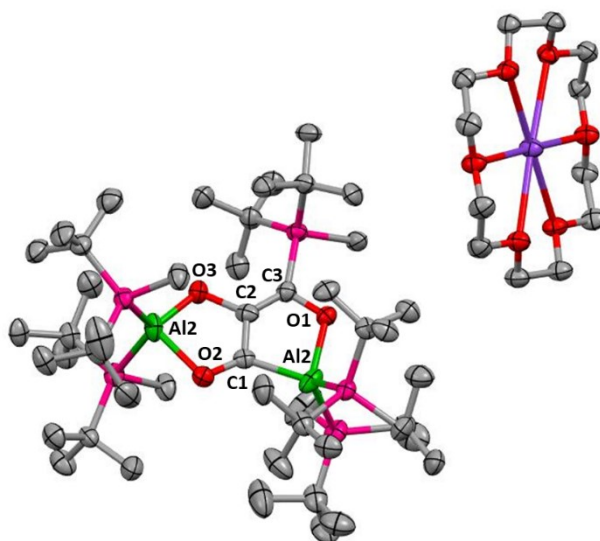

**Figure S26:** Molecular structure of **7**. Thermal ellipsoids are shown at a 50% probability level. H atoms are omitted for clarity. Selected bond lengths [Å] and angles [°]: Al1-O3 1.718(4), Al1-O2 1.998(4), C2-O3 1.501(5), C1-O2 1.291(7), C2-C3 1.322(5), C1-C2 1.380(7), C3-O1 1.341(6), Al2-O1 2.006(4), Al2-C1 1.954(6).

**Table S3:** Crystallographic details of **7**.

|                                            |                                                                                                  |
|--------------------------------------------|--------------------------------------------------------------------------------------------------|
| <b>CCDC number</b>                         | 2543019                                                                                          |
| <b>Empirical formula</b>                   | C <sub>68</sub> H <sub>144</sub> Al <sub>2</sub> KN <sub>0</sub> O <sub>11</sub> Si <sub>5</sub> |
| <b>Formula weight</b>                      | 1371.34                                                                                          |
| <b>Temperature [K]</b>                     | 100                                                                                              |
| <b>Crystal system</b>                      | monoclinic                                                                                       |
| <b>Space group (number)</b>                | <i>P</i> 2 <sub>1</sub> / <i>n</i>                                                               |
| <b><i>a</i> [Å]</b>                        | 19.6166(11)                                                                                      |
| <b><i>b</i> [Å]</b>                        | 21.0516(12)                                                                                      |
| <b><i>c</i> [Å]</b>                        | 21.7848(12)                                                                                      |
| <b>α [°]</b>                               | 90                                                                                               |
| <b>β [°]</b>                               | 91.664(2)                                                                                        |
| <b>γ [°]</b>                               | 90                                                                                               |
| <b>Volume [Å<sup>3</sup>]</b>              | 8992.5(9)                                                                                        |
| <b>Z</b>                                   | 4                                                                                                |
| <b>ρ<sub>calc</sub> [gcm<sup>-3</sup>]</b> | 1.013                                                                                            |

|                                                                       |                                                                            |
|-----------------------------------------------------------------------|----------------------------------------------------------------------------|
| <b><math>\mu</math> [mm<sup>-1</sup>]</b>                             | 0.191                                                                      |
| <b><math>F(000)</math></b>                                            | 3020                                                                       |
| <b>Radiation</b>                                                      | MoK $\alpha$ ( $\lambda=0.71073$ Å)                                        |
| <b>2<math>\theta</math> range [°]</b>                                 | 3.87 to 55.14                                                              |
| <b>Index ranges</b>                                                   | -25 $\leq$ h $\leq$ 25<br>-27 $\leq$ k $\leq$ 27<br>-28 $\leq$ l $\leq$ 28 |
| <b>Independent reflections</b>                                        | 20708                                                                      |
| <b>Completeness to <math>\theta = 25.242^\circ</math></b>             | 99.4 %                                                                     |
| <b>Data / Restraints / Parameters</b>                                 | 20708 / 2565 / 1212                                                        |
| <b>Absorption correction T<sub>min</sub>/T<sub>max</sub> (method)</b> | 0.711 / 0.746 (multi-scan)                                                 |
| <b>Goodness-of-fit on <math>F^2</math></b>                            | 1.189                                                                      |
| <b>Final <math>R</math> indexes [<math>\geq 2\sigma(I)</math>]</b>    | $R_1 = 0.0655$<br>$wR_2 = 0.2244$                                          |

## 4 References

- [1] T.J. Barton and C.R. Tully, *The Journal of Organic Chemistry* **1978**, 43, 3649-3653.
- [2] N. Wiberg and C.-K. Kim, *Chem. Ber.* **1986**, 119, 2980-2994.
- [3] M. Nakamoto, T. Yamasaki, and A. Sekiguchi, *J. Am. Chem. Soc.* **2005**, 127, 6954-6955.
- [4] B.L.L. Réant, V.E.J. Berryman, A.R. Basford, L.E. Nodaraki, A.J. Wooles, F. Tuna, N. Kaltsoyannis, D.P. Mills, and S.T. Liddle, *J. Am. Chem. Soc.* **2021**, 143, 9813-9824.
- [5] G.R. Fulmer, A.J.M. Miller, N.H. Sherden, H.E. Gottlieb, A. Nudelman, B.M. Stoltz, J.E. Bercaw, and K.I. Goldberg, *Organometallics* **2010**, 29, 2176-2179.
- [6] A.S. Bruker and A. Bruker, *Acta Crystallogr., Sect. A: Found. Crystallogr* **1990**, 46, 467-473.
- [7] SADABS, SADABS. 2016, Bruker AXS Inc.: Madison, Wisconsin, USA.
- [8] *APEX suite of crystallographic software, APEX 3, version 2015.5-2*. 2015, Bruker AXS Inc.: Madison, Wisconsin, USA.
- [9] G.M. Sheldrick, *Acta Crystallographica Section C: Crystal Structure Communications* **2015**, 71, 3-8.
- [10] G.M. Sheldrick, *Acta Crystallographica Section A: Foundations of Crystallography* **2015**, 71, 3-8.
- [11] C.B. Hübschle, G.M. Sheldrick, and B. Dittrich, *J. Appl. Cryst.* **2011**, 44, 1281.
- [12] G.M. Sheldrick, *SHELXL-97*. 1998, University of Göttingen: Göttingen, Germany.
- [13] A.J.C. Wilson, *International Tables for Crystallography, Vol. C* **1992**, Kluwer Academic Publishers: Dordrecht, Netherlands
- [14] A. Spek, *Acta Crystallographica Section C* **2015**, 71, 9-18.
- [15] A.L. Spek, *PLATON, A Multipurpose Crystallographic Tool*. 2010, Utrecht University: Utrecht, Netherlands
- [16] C.F. Macrae, I. Sovago, S.J. Cottrell, P.T.A. Galek, P. McCabe, E. Pidcock, M. Platings, G.P. Shields, J.S. Stevens, M. Towler, and P.A. Wood, *J. Appl. Crystallogr.* **2020**, 53, 226-235.

[17] D. Kratzert, *FinalCif*.
